# Supplementary material for: Warm-season hydroclimate variability in Central China since 1866 AD and its relations with the East Asian Summer Monsoon: evidence from tree-ring earlywood width
Source: Copernicus journal article supplement (doi:10.5194/cp-2018-141), 2018-10-29
Supplement: Supplementary file [file cp-2018-141-AC2-supplement.zip]

**Table S1.** Correlation coefficients between the tree-ring width chronologies from the two study sites, BYS and LCM, over their common period when EPS larger than 0.85.

| Chronologies | Detrending method         |                           |                           |
|--------------|---------------------------|---------------------------|---------------------------|
|              | NELR                      | SP67                      | SPA50                     |
| EWB STD      | 0.8 (1888) / 0.78 (1889)  | 0.82 (1888) / 0.8 (1889)  | 0.82 (1888) / 0.8 (1889)  |
| LWW STD      | 0.65 (1892) / 0.67 (1897) | 0.73 (1907) / 0.69 (1912) | 0.67 (1892) / 0.63 (1897) |
| TRW STD      | 0.76 (1884) / 0.72 (1888) | 0.8 (1887) / 0.76 (1892)  | 0.80 (1887) / 0.76 (1892) |
| EWB SSF      | 0.79 (1888) / 0.78 (1889) | 0.76 (1888) / 0.77 (1889) | 0.81 (1888) / 0.78 (1889) |
| LWW SSF      | 0.67 (1892) / 0.68 (1897) | 0.58 (1892) / 0.62 (1897) | 0.63 (1896) / 0.64 (1901) |
| TRW SSF      | 0.74 (1884) / 0.72 (1888) | 0.74 (1887) / 0.73 (1892) | 0.76 (1884) / 0.74 (1889) |

Note: The correlation coefficients before (after) the slashes are for the original (prewhitened and linearly detrended) STD and SSF chronologies. All correlation coefficients are statistically significant at the 0.001 level. The beginning year of the common period was shown in the bracket. The ending year for all chronologies was 2005.

**Table S2.** Descriptive statistics of the composite STD and SSF tree–ring width chronologies.

| Detrending method | Chronology | Starting year<br>when EPS > 0.85 | Standard<br>deviation | Mean<br>sensitivity | First-order<br>autocorrelation |
|-------------------|------------|----------------------------------|-----------------------|---------------------|--------------------------------|
| NELR              | EWV STD    | 1864                             | 0.232                 | 0.217               | 0.306                          |
|                   | LWW STD    | 1871                             | 0.25                  | 0.219               | 0.358                          |
|                   | TRW STD    | 1864                             | 0.216                 | 0.194               | 0.389                          |
| SP67              | EWV STD    | 1864                             | 0.232                 | 0.218               | 0.29                           |
|                   | LWW STD    | 1871                             | 0.249                 | 0.229               | 0.313                          |
|                   | TRW STD    | 1864                             | 0.215                 | 0.196               | 0.363                          |
| SPA50             | EWV STD    | 1864                             | 0.232                 | 0.218               | 0.281                          |
|                   | LWW STD    | 1871                             | 0.248                 | 0.227               | 0.301                          |
|                   | TRW STD    | 1859                             | 0.214                 | 0.196               | 0.354                          |
| NELR              | EWV SSF    | 1864                             | 0.237                 | 0.218               | 0.346                          |
|                   | LWW SSF    | 1865                             | 0.265                 | 0.221               | 0.438                          |
|                   | TRW SSF    | 1859                             | 0.222                 | 0.193               | 0.44                           |
| SP67              | EWV SSF    | 1864                             | 0.24                  | 0.217               | 0.348                          |
|                   | LWW SSF    | 1867                             | 0.257                 | 0.229               | 0.362                          |
|                   | TRW SSF    | 1864                             | 0.222                 | 0.197               | 0.403                          |
| SPA50             | EWV SSF    | 1864                             | 0.234                 | 0.207               | 0.353                          |
|                   | LWW SSF    | 1868                             | 0.252                 | 0.223               | 0.357                          |
|                   | TRW SSF    | 1859                             | 0.216                 | 0.192               | 0.378                          |

**Table S3.** Statistics of the detrended ring-width series over their common period 1915–2005.

| Detrending method | Chronology | PC1   | Rbar  | SNR    | EPS   |
|-------------------|------------|-------|-------|--------|-------|
| NELR              | EWV STD    | 0.386 | 0.362 | 31.187 | 0.969 |
|                   | LWW STD    | 0.328 | 0.298 | 23.303 | 0.959 |
|                   | TRW STD    | 0.384 | 0.356 | 30.453 | 0.968 |
| SP67              | EWV STD    | 0.427 | 0.408 | 37.948 | 0.974 |
|                   | LWW STD    | 0.353 | 0.326 | 26.594 | 0.964 |
|                   | TRW STD    | 0.422 | 0.399 | 36.495 | 0.973 |
| SPA50             | EWV STD    | 0.411 | 0.391 | 35.311 | 0.972 |
|                   | LWW STD    | 0.341 | 0.314 | 25.203 | 0.962 |
|                   | TRW STD    | 0.404 | 0.38  | 33.745 | 0.971 |
| NELR              | EWV SSF    | 0.399 | 0.375 | 32.991 | 0.971 |
|                   | LWW SSF    | 0.317 | 0.285 | 21.911 | 0.956 |
|                   | TRW SSF    | 0.393 | 0.359 | 31.249 | 0.969 |
| SP67              | EWV SSF    | 0.453 | 0.436 | 42.488 | 0.977 |
|                   | LWW SSF    | 0.366 | 0.339 | 28.266 | 0.966 |
|                   | TRW SSF    | 0.441 | 0.42  | 39.817 | 0.976 |
| SPA50             | EWV SSF    | 0.474 | 0.458 | 46.418 | 0.979 |
|                   | LWW SSF    | 0.352 | 0.326 | 26.637 | 0.964 |
|                   | TRW SSF    | 0.431 | 0.409 | 38.087 | 0.974 |

Note: The common period for the tree–ring width dataset is calculated with the “common.interval” function in R package “dplR” (<https://r-forge.r-project.org/projects/dplr/>) based on a trade–off between the maximum number of series and years. The statistics, PC1, Rbar, SNR, and EPS represent the first principal component, mean interseries correlation between all series, signal–to–noise ratio, and expressed population signal, respectively.

**Table S4.** The meteorological stations utilized by CRU dataset (<http://www.cru.uea.ac.uk/data>) located

in the area between latitudes 32° N and 34.5° N, and longitudes 111° E and 112° E.

| Meteorological station | Longitude (°E) | Latitude (°N) | Climate factor | Temporal cover                                                                                       |
|------------------------|----------------|---------------|----------------|------------------------------------------------------------------------------------------------------|
| Lushi                  | 111.03         | 34.05         | Precipitation  | 1952.07–2013.12                                                                                      |
|                        |                |               | Temperature    | 1952.07–2016.12                                                                                      |
| Laohekou               | 111.73         | 32.43         | Precipitation  | 1933.02–1933.11; 1934.01–1935.06; 1935.08–1935.12; 1936.08–1938.07; 1950.06–2005.06; 2005.08–2013.12 |
|                        |                |               | Temperature    | 1951.01–2016.12                                                                                      |
| Yunxian                | 111.8          | 32.9          | Precipitation  | 1933.03–1938.05; 1938.07–1947.10; 1950.03–1990.12; 1991.05; 1991.07–1991.08                          |

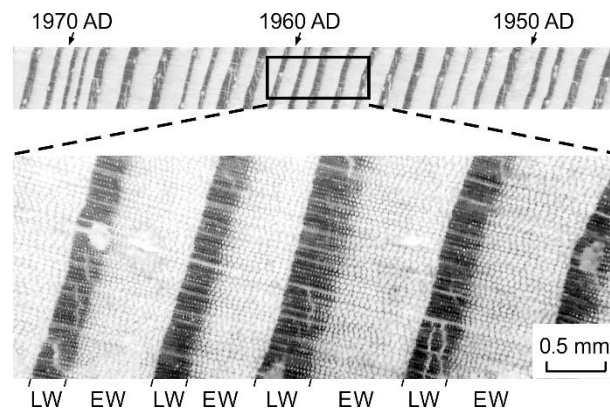

**Figure S1.** Scanned photograph of a section of *P. tabulaeformis* tree-ring sample (LCM0118A). The distinct earlywood (EW) and latewood (LW) segments can be identified by inspection under a microscope.

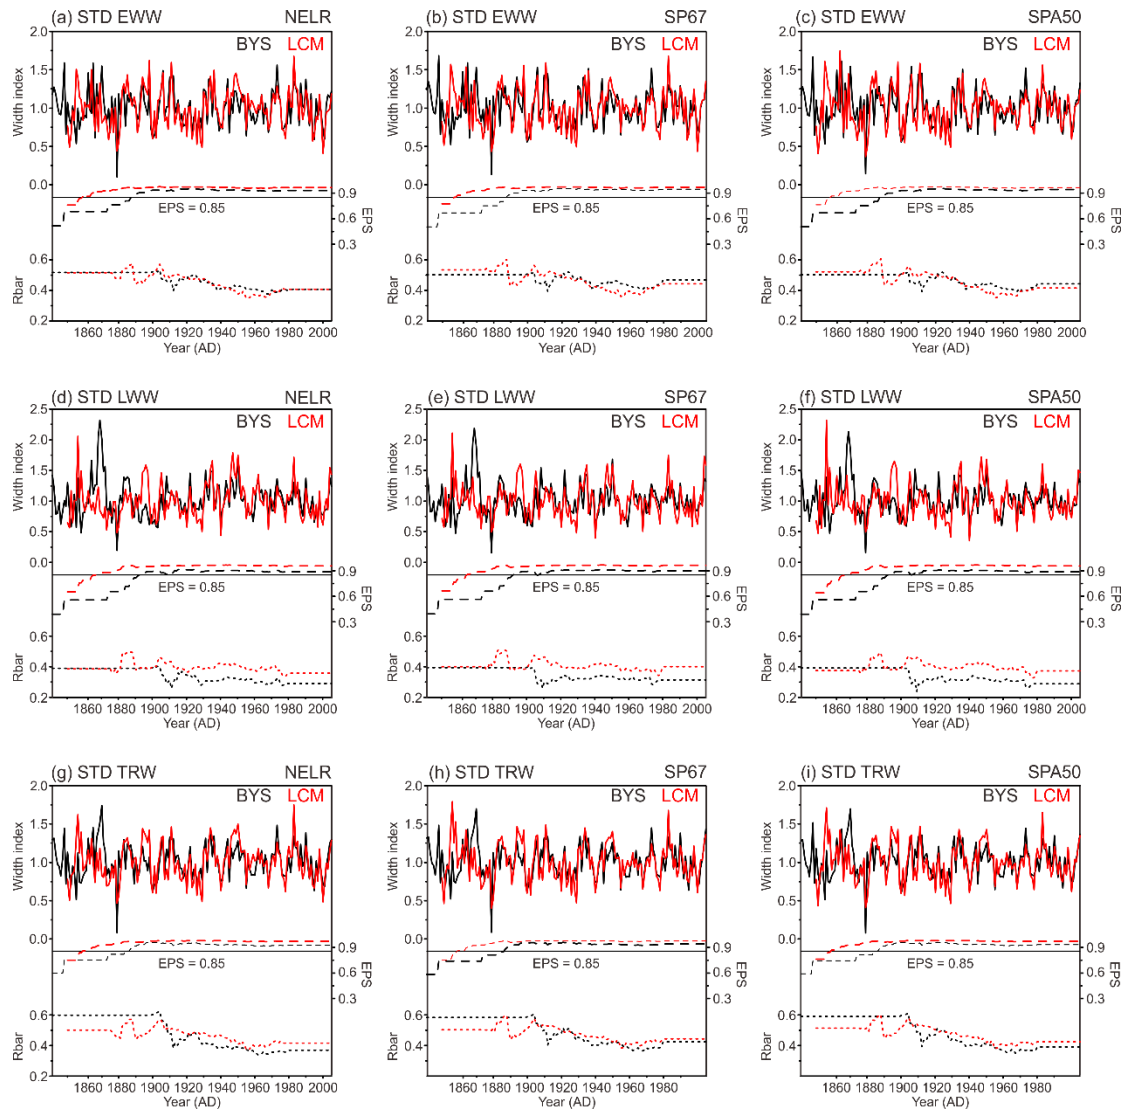

**Figure S2.** Standard tree-ring width chronologies (solid curve) generated using three kinds of detrending methods for (a–c) earlywood width (EWW), (d–f) latewood width (LWW), and (g–i) total tree-ring width (TRW) at the two study sites, BYS (black) and LCM (red). The three kinds of detrending methods are: (1) negative exponential function together with linear regression with negative (or zero) slope (NELR), (2) cubic smoothed splines with a 50 % frequency cutoff of 67 % of the series length (SP67), and (3) age-dependent splines with an initial stiffness of 50 years (SPA50). The dashed and dotted curves denote the running expressed population signal (EPS) and Rbar values, respectively. The horizontal line indicates the threshold EPS value of 0.85. The running EPS and Rbar values were calculated over a 51-year window.

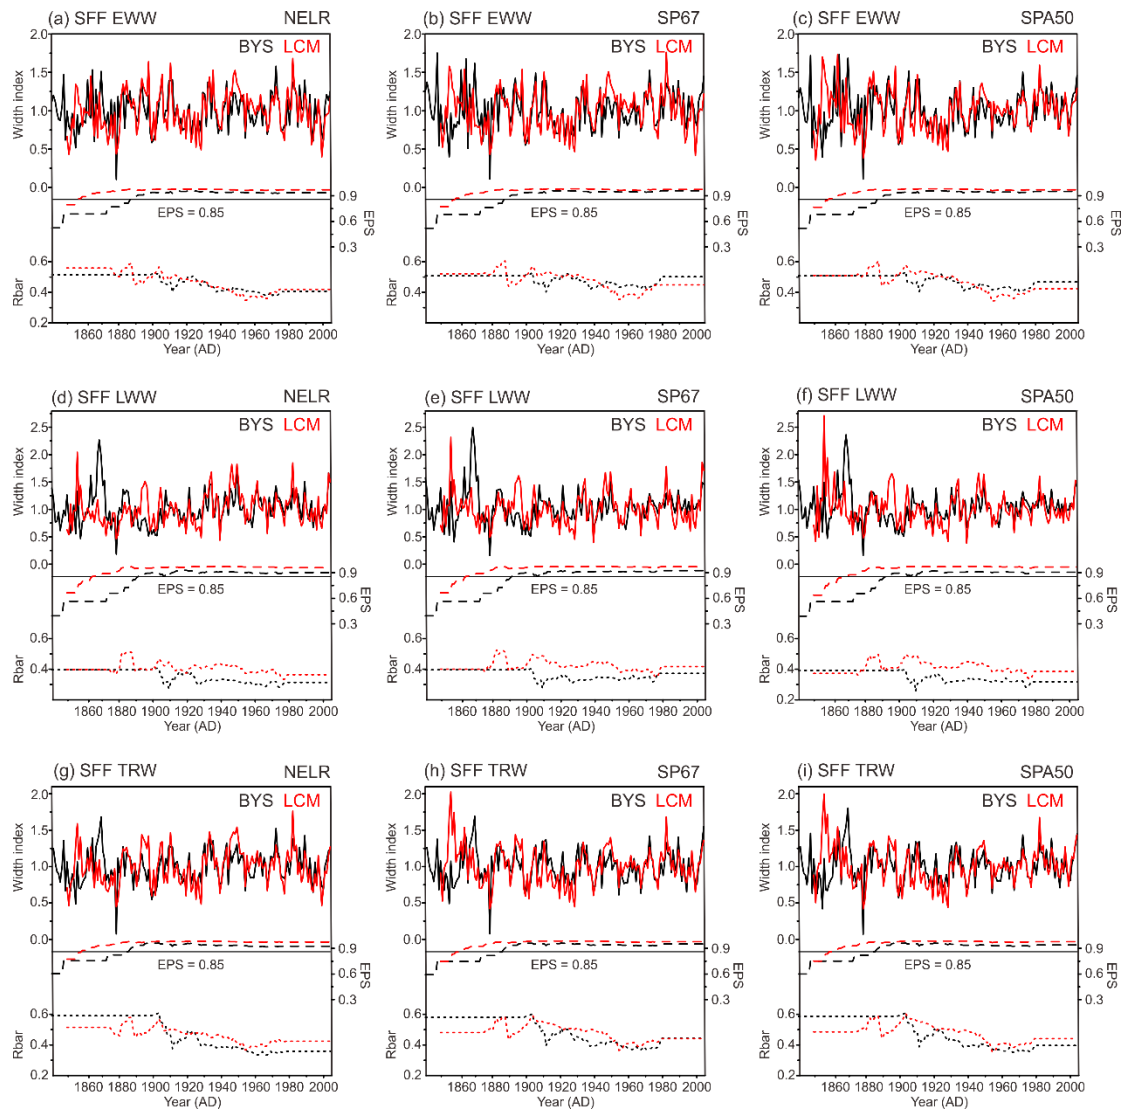

**Figure S3.** The same as Figure S2, but for the signal-free (SSF) chronologies.

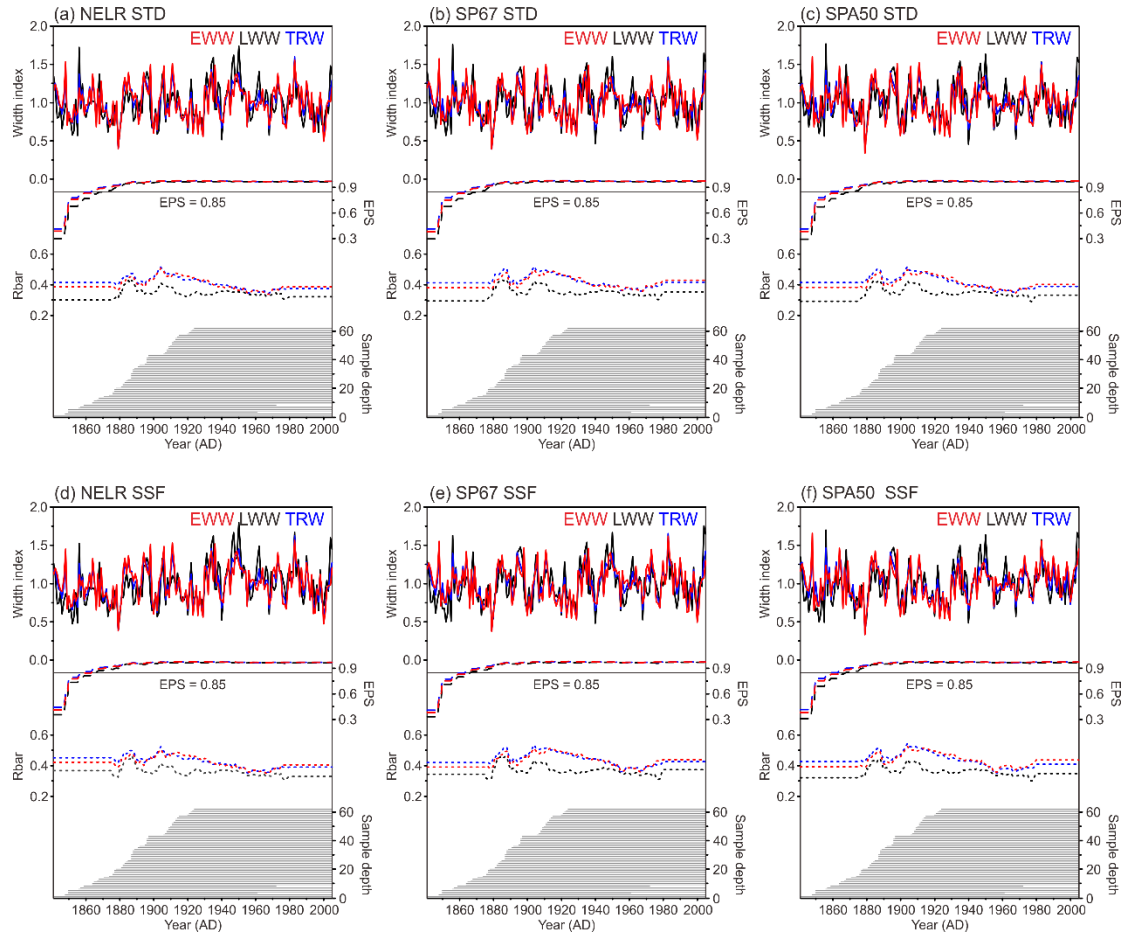

**Figure S4.** Composite STD (a–c) and SSF (d–f) tree-ring width chronologies for EWW (red), LWW (black), and TRW (blue) generated using the merged tree-ring samples from the two study sites, BYS and LCM, based on three kinds of detrending methods. The detrending methods are: (1) negative exponential function together with linear regression with negative (or zero) slope (NELR), (2) cubic smoothed splines with a 50 % frequency cutoff of 67 % of the series length (SP67), and (3) age-dependent splines with an initial stiffness of 50 years (SPA50). The dashed and dotted curves denote the running expressed population signal (EPS) and Rbar values, respectively. The horizontal line indicates the threshold EPS value of 0.85. The running EPS and Rbar values were calculated over a 51-year window. The segment plot indicated the sample depth.



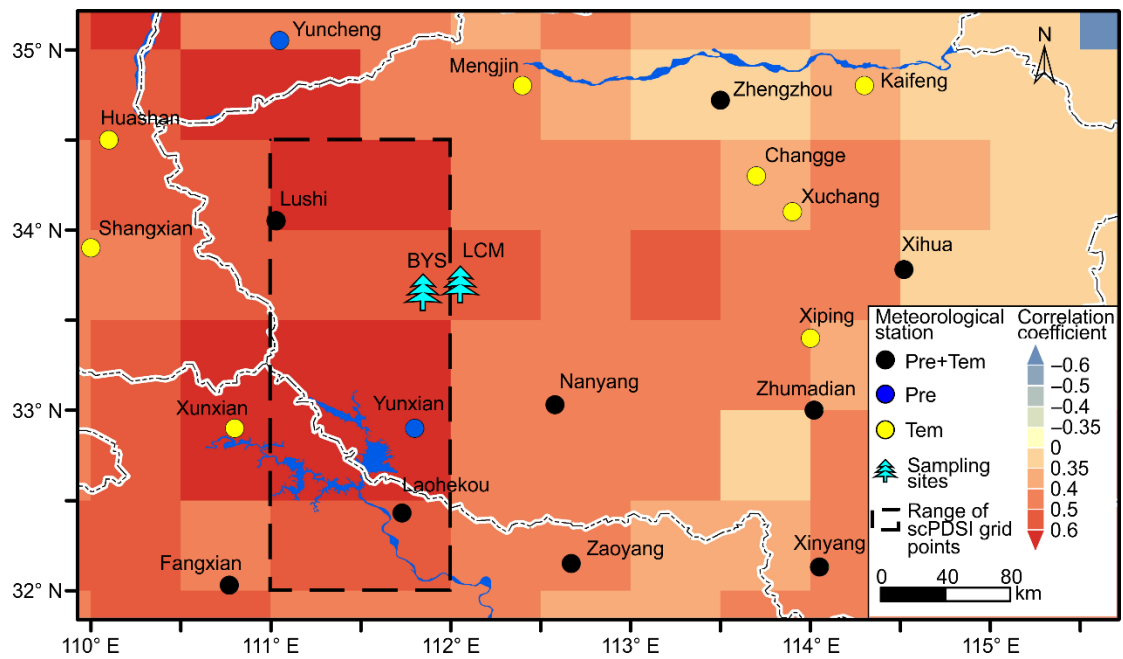

**Figure S5.** Spatial distribution of the meteorological stations included in the CRU dataset (<http://www.cru.uea.ac.uk/data>) around the tree-ring sampling sites, BYS and LCM. Black cycles represent the meteorological stations that provide both precipitation and temperature data. While, blue (yellow) cycles represent those that only provide precipitation (temperature) data. The dashed rectangle indicates the range of scPDSI grid points used for calibration in this study. The color patches denote the spatial correlation coefficients between May-July scPDSI and NELR based EWW STD chronology.

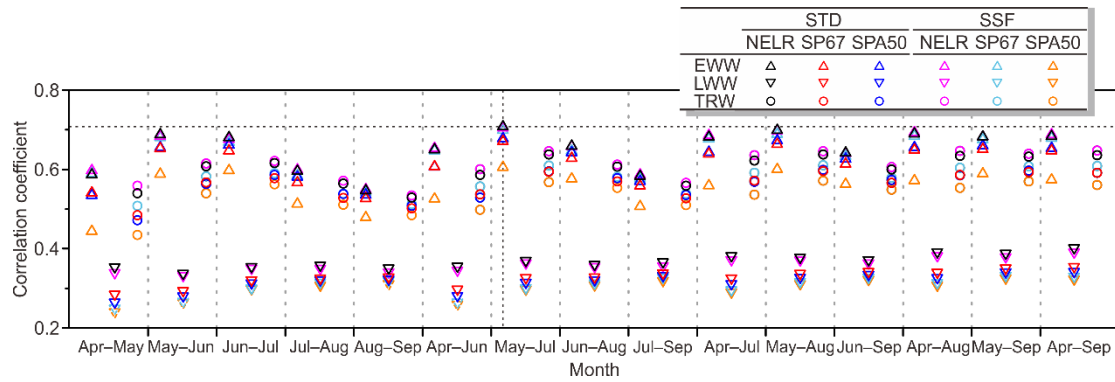

**Figure S6.** Correlation coefficients between the tree-ring width chronologies and multi-month averaged scPDSI (April to September of the current year). The up triangle, down triangle, and circle indicate the chronologies of EWW, LWW, and TRW, respectively. The color black, red and blue indicate the STD chronologies generated using the detrending methods NELR, SP67, and SPA50, respectively. The color magenta, cyan, and orange indicate the SSF chronologies generated using the detrending methods NELR, SP67, and SPA50, respectively. The dashed symbol indicates that the correlation does not reach the 0.05 significance level, which were tested using the Monte Carlo method (Efron and Tibshirani, 1986; Macias-Fauria et al., 2012).

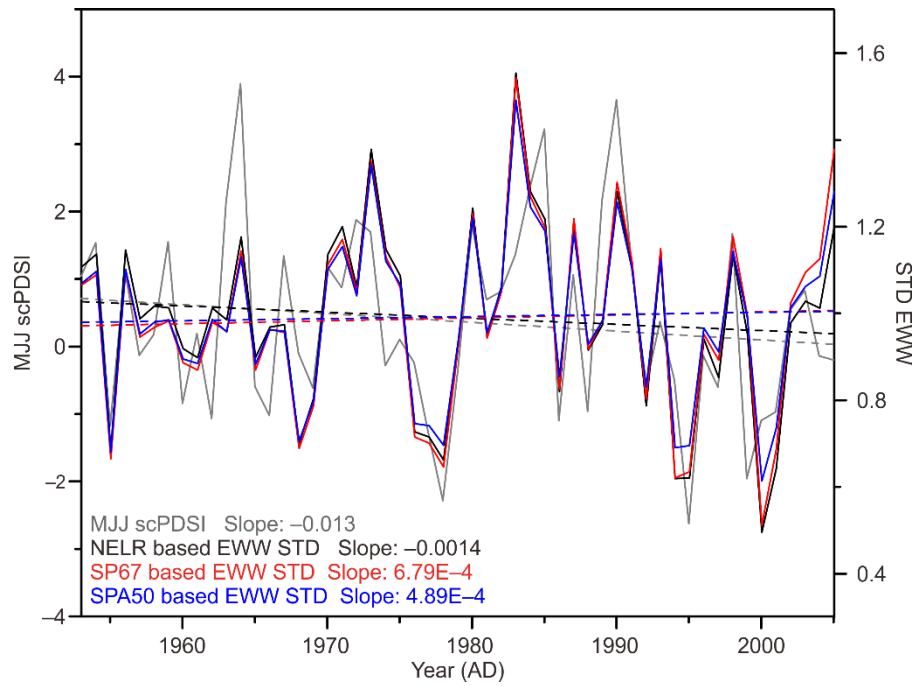

**Figure S7.** Comparisons between the MJJ scPDSI (gray) and EWW STD chronologies generated using the detrending methods NELR (black), SP67 (red), and SPA50 (blue) during the period 1953–2005. The corresponding linear trends were indicated by the dashed lines, and the slope statistics were labelled in the bottom left corner of the figure.

## References

Efron, B., and Tibshirani, R.: Bootstrap methods for standard errors, confidence intervals, and other measures of statistical accuracy, *Stat. Sci.*, 1, 54–77, 1986.

Macias-Fauria, M., Grinsted, A., Helama, S., and Holopainen, J.: Persistence matters: Estimation of the statistical significance of paleoclimatic reconstruction statistics from autocorrelated time series, *Dendrochronologia*, 30, 179–187, <https://doi.org/10.1016/j.dendro.2011.08.003>, 2012.
